# Supplementary material for: Impact of the community-based newborn care package in Nepal: a quasi-experimental evaluation
Source: PubMed Central journal article supplement — BMJ Open. 2017 Oct 5;7(10):e015285. doi: 10.1136/bmjopen-2016-015285 (PMC5640009; doi:10.1136/bmjopen-2016-015285), 2017-10-05
Supplement: bmjopen-2016-015285supp001.pdf [file bmjopen-2016-015285supp001.pdf]

## Impact of the Community-Based Newborn Care Package in Nepal: a quasi-experimental evaluation

Deepak Paudel\*, Center for International Health, Ludwig Maximilians University, Munich, Germany; United States Agency for International Development, Nepal

Email: [paudeld@gmail.com](mailto:paudeld@gmail.com)

Ishwar B. Shrestha, Department of Community Medicine and Family Health, Institute of Medicine, Tribhuvan University, Kathmandu, Nepal

Matthias Siebeck, Center for International Health, LMU Munich, Germany

Email: [Matthias.Siebeck@med.uni-muenchen.de](mailto:Matthias.Siebeck@med.uni-muenchen.de)

Eva Rehfuess, Institute for Medical Information Processing, Biometry and Epidemiology, Pettenkofer School of Public Health and Center for International Health, LMU Munich, Germany

Email: [rehfuess@ibe.med.uni-muenchen.de](mailto:rehfuess@ibe.med.uni-muenchen.de)

### Supplementary Information

| Table S1<br><b>CB NCP Training Outputs</b><br>District specific training start and end dates, DHS data collection dates, number of health workers trained and supporting agency |                                     |                                   |                                     |                             |                |                 |                              |                   |
|---------------------------------------------------------------------------------------------------------------------------------------------------------------------------------|-------------------------------------|-----------------------------------|-------------------------------------|-----------------------------|----------------|-----------------|------------------------------|-------------------|
| District                                                                                                                                                                        | Training start date<br>(month/year) | Training end date<br>(month/year) | DHS data collection<br>(month/year) | Exposure period<br>(months) | # CHWs trained | # FCHVs trained | # facility-based HWs trained | Supporting agency |
| Bardiya                                                                                                                                                                         | 5/2009                              | 12/2009                           | 2-3/2011                            | 14                          | 56             | 842             | 132                          | SAVE              |
| Chitwan                                                                                                                                                                         | 4/2010                              | 7/2010                            | 2-3/2011                            | 7                           | 74             | 340             | 136                          | UNICEF            |
| Dang                                                                                                                                                                            | 11/2009                             | 4/2010                            | 4-6/2011                            | 12                          | 62             | 840             | 179                          | UNICEF            |
| Dhankuta                                                                                                                                                                        | 4/2010                              | 7/2010                            | 3-4/2011                            | 8                           | 60             | 315             | 91                           | GON               |
| Doti                                                                                                                                                                            | 6/2009                              | 7/2010                            | 5-6/2011                            | 10                          | 84             | 653             | 127                          | CARE              |
| Kavre                                                                                                                                                                           | 11/2009                             | 7/2010                            | 6/2011                              | 11                          | 128            | 923             | 244                          | UNICEF            |
| Morang                                                                                                                                                                          | 4/2010                              | 7/2010                            | 2-3/2011                            | 7                           | 114            | 594             | 184                          | GON               |
| Palpa                                                                                                                                                                           | 4/2010                              | 7/2010                            | 4/2011                              | 9                           | 93             | 585             | 130                          | GON               |
| Parsa                                                                                                                                                                           | 5/2009                              | 7/2010                            | 2-3/2011                            | 7                           | 132            | 999             | 231                          | PLAN              |
| Sunsari                                                                                                                                                                         | 5/2009                              | 2/2010                            | 2-3, 5-6/2011                       | 12                          | 99             | 981             | 161                          | PLAN              |
| <b>TOTAL</b>                                                                                                                                                                    | --                                  | --                                |                                     | 7-14                        | 902            | 7072            | 1615                         |                   |

DHS: Demographic and Health Survey; CHW: community health worker; FCHV: female community health volunteer; HW: health worker; SAVE: Save the Children; GON: Government of Nepal; UNICEF: United Nations Children Fund; CARE: CARE International; PLAN: Plan International

| <b>Table S2</b>                                                                                                                                                                                                                                 |               |                   |               |             |                 |               |            |                      |              |
|-------------------------------------------------------------------------------------------------------------------------------------------------------------------------------------------------------------------------------------------------|---------------|-------------------|---------------|-------------|-----------------|---------------|------------|----------------------|--------------|
| <b>Difference-in-differences analysis</b> for key practices to improved neonatal health (specific and aggregate outcomes in percent), for most recent births to women aged 15-49 years in the five years preceding the survey based on DHS data |               |                   |               |             |                 |               |            |                      |              |
|                                                                                                                                                                                                                                                 |               | Intervention area |               |             | Comparison area |               |            | Diff. of differences | p-value      |
|                                                                                                                                                                                                                                                 |               | Before (n=533)    | After (n=168) | Diff.       | Before (n=347)  | After (n=104) | Diff.      |                      |              |
| Saved money                                                                                                                                                                                                                                     | Yes           | 37.6              | 39.7          | 2.1         | 28.0            | 37.3          | 9.3        | -7.2                 | 0.419        |
|                                                                                                                                                                                                                                                 | No            | 62.4              | 60.3          |             | 72.0            | 62.7          |            |                      |              |
| Arranged transport                                                                                                                                                                                                                              | Yes           | 3.8               | 6.7           | 2.9         | 3.7             | 7.6           | 3.9        | -1.1                 | 0.835        |
|                                                                                                                                                                                                                                                 | No            | 96.2              | 93.3          |             | 96.3            | 92.4          |            |                      |              |
| Found blood donor                                                                                                                                                                                                                               | Yes           | 0.7               | 1.4           | 0.7         | 0.0             | 0.0           | 0.0        | 0.7                  | na           |
|                                                                                                                                                                                                                                                 | No            | 99.3              | 98.6          |             | 100.0           | 100.0         |            |                      |              |
| Identified health worker                                                                                                                                                                                                                        | Yes           | 1.2               | 0.7           | -0.5        | 0.2             | 0.0           | -0.2       | -0.3                 | 0.622        |
|                                                                                                                                                                                                                                                 | No            | 98.8              | 99.3          |             | 99.8            | 100.0         |            |                      |              |
| Bought safe delivery kit                                                                                                                                                                                                                        | Yes           | 1.2               | 0.7           | -0.5        | 2.4             | 0.2           | -2.2       | 1.6                  | 0.167        |
|                                                                                                                                                                                                                                                 | No            | 98.8              | 99.3          |             | 97.6            | 99.8          |            |                      |              |
| At least one <sup>1</sup> preparation                                                                                                                                                                                                           | Yes           | 42.4              | 44.6          | 2.2         | 31.5            | 39.1          | 7.6        | -5.4                 | 0.575        |
|                                                                                                                                                                                                                                                 | No            | 57.6              | 55.4          |             | 68.5            | 60.9          |            |                      |              |
| <b>Birth preparedness<sup>2</sup> (combined)</b>                                                                                                                                                                                                | <b>Better</b> | <b>6.2</b>        | <b>8.4</b>    | <b>2.2</b>  | <b>4.8</b>      | <b>6.0</b>    | <b>1.2</b> | <b>1.0</b>           | <b>0.810</b> |
|                                                                                                                                                                                                                                                 | <b>Poorer</b> | <b>93.8</b>       | <b>91.6</b>   |             | <b>95.2</b>     | <b>94.0</b>   |            |                      |              |
| Antenatal care by skilled provider                                                                                                                                                                                                              | Yes           | 62.6              | 69.6          | 7.0         | 53.4            | 64.5          | 11.1       | -4.1                 | 0.607        |
|                                                                                                                                                                                                                                                 | No            | 37.4              | 30.4          |             | 46.6            | 35.5          |            |                      |              |
| Antenatal care visits, four or more                                                                                                                                                                                                             | Yes           | 52.4              | 64.5          | 12.1        | 40.8            | 55.7          | 15.0       | -2.8                 | 0.813        |
|                                                                                                                                                                                                                                                 | No            | 47.6              | 35.5          |             | 59.2            | 44.3          |            |                      |              |
| Iron tablets taken                                                                                                                                                                                                                              | Yes           | 78.5              | 87.2          | 8.7         | 76.7            | 80.0          | 3.4        | 5.3                  | 0.305        |
|                                                                                                                                                                                                                                                 | No            | 21.5              | 12.8          |             | 23.3            | 20.0          |            |                      |              |
| TT2 taken                                                                                                                                                                                                                                       | Yes           | 74.5              | 75.7          | 1.2         | 68.6            | 63.8          | -4.8       | 6.0                  | 0.371        |
|                                                                                                                                                                                                                                                 | No            | 25.5              | 24.3          |             | 31.4            | 36.2          |            |                      |              |
| Blood pressure measured <sup>3</sup>                                                                                                                                                                                                            | Yes           | 75.8              | 85.4          | 9.6         | 71.5            | 81.0          | 9.6        | 0.0                  | 0.998        |
|                                                                                                                                                                                                                                                 | No            | 24.2              | 14.6          |             | 28.5            | 19.0          |            |                      |              |
| Urine sample taken <sup>3</sup>                                                                                                                                                                                                                 | Yes           | 54.1              | 65.0          | 10.9        | 42.5            | 46.7          | 4.2        | 6.8                  | 0.351        |
|                                                                                                                                                                                                                                                 | No            | 45.9              | 35.0          |             | 57.5            | 53.3          |            |                      |              |
| Blood sample taken <sup>3</sup>                                                                                                                                                                                                                 | Yes           | 42.0              | 48.7          | 6.7         | 36.5            | 42.0          | 5.5        | 1.2                  | 0.897        |
|                                                                                                                                                                                                                                                 | No            | 58.0              | 51.3          |             | 63.5            | 58.0          |            |                      |              |
| Told about pregnancy complications <sup>3</sup>                                                                                                                                                                                                 | Yes           | 64.5              | 77.9          | 13.4        | 56.9            | 54.1          | -2.8       | 16.2                 | 0.15         |
|                                                                                                                                                                                                                                                 | No            | 35.5              | 22.1          |             | 43.1            | 45.9          |            |                      |              |
| Told about where to go in complications                                                                                                                                                                                                         | Yes           | 65.5              | 78.2          | 12.7        | 55.1            | 53.8          | -1.4       | 14.0                 | 0.164        |
|                                                                                                                                                                                                                                                 | No            | 34.5              | 21.8          |             | 44.9            | 46.2          |            |                      |              |
| Antenatal care quality – at least one <sup>4</sup>                                                                                                                                                                                              | Yes           | 36.0              | 43.8          | 7.8         | 29.0            | 30.9          | 1.9        | 5.9                  | 0.524        |
|                                                                                                                                                                                                                                                 | No            | 64.0              | 56.2          |             | 71.0            | 69.1          |            |                      |              |
| <b>ANC care seeking<sup>5</sup> (combined)</b>                                                                                                                                                                                                  | <b>Better</b> | <b>33.7</b>       | <b>49.7</b>   | <b>16.0</b> | <b>26.4</b>     | <b>33.2</b>   | <b>6.8</b> | <b>9.2</b>           | <b>0.383</b> |
|                                                                                                                                                                                                                                                 | <b>Poorer</b> | <b>66.3</b>       | <b>50.3</b>   |             | <b>73.6</b>     | <b>66.8</b>   |            |                      |              |
| <b>ANC quality<sup>6</sup> (combined)</b>                                                                                                                                                                                                       | <b>Better</b> | <b>47.4</b>       | <b>59.9</b>   | <b>12.5</b> | <b>34.8</b>     | <b>37.8</b>   | <b>3.0</b> | <b>9.5</b>           | <b>0.290</b> |
|                                                                                                                                                                                                                                                 | <b>Poorer</b> | <b>52.6</b>       | <b>40.1</b>   |             | <b>65.2</b>     | <b>62.2</b>   |            |                      |              |

| <b>Table S2 (continue)</b>                                                                                                                                                                                                                      |               |             |             |             |             |             |             |             |              |
|-------------------------------------------------------------------------------------------------------------------------------------------------------------------------------------------------------------------------------------------------|---------------|-------------|-------------|-------------|-------------|-------------|-------------|-------------|--------------|
| <b>Difference-in-differences analysis</b> for key practices to improved neonatal health (specific and aggregate outcomes in percent), for most recent births to women aged 15-49 years in the five years preceding the survey based on DHS data |               |             |             |             |             |             |             |             |              |
| Delivery at health institution                                                                                                                                                                                                                  | Yes           | 42.9        | 60.3        | 17.4        | 30.5        | 42.0        | 11.6        | 5.8         | 0.488        |
|                                                                                                                                                                                                                                                 | No            | 57.1        | 39.7        |             | 69.5        | 58.0        |             |             |              |
| <b>Delivery attended by SBA<sup>7</sup></b>                                                                                                                                                                                                     | <b>Yes</b>    | <b>46.7</b> | <b>57.7</b> | <b>11.0</b> | <b>31.2</b> | <b>37.6</b> | <b>6.4</b>  | <b>4.6</b>  | <b>0.577</b> |
|                                                                                                                                                                                                                                                 | <b>No</b>     | <b>53.3</b> | <b>42.3</b> |             | <b>68.8</b> | <b>62.4</b> |             |             |              |
| Bathed after 24 hours <sup>8</sup>                                                                                                                                                                                                              | Yes           | 58.1        | 74.9        | 16.9        | 46.7        | 57.6        | 10.9        | 6.0         | 0.492        |
|                                                                                                                                                                                                                                                 | No            | 42.0        | 25.1        |             | 53.3        | 42.4        |             |             |              |
| Dried before placenta delivered <sup>8</sup>                                                                                                                                                                                                    | Yes           | 75.3        | 83.9        | 8.6         | 70.6        | 74.2        | 3.6         | 5.0         | 0.601        |
|                                                                                                                                                                                                                                                 | No            | 24.7        | 16.1        |             | 29.4        | 25.8        |             |             |              |
| Wrapped in cloth <sup>8</sup>                                                                                                                                                                                                                   | Yes           | 80.2        | 82.6        | 2.4         | 71.3        | 86.6        | 15.3        | -12.9       | 0.072        |
|                                                                                                                                                                                                                                                 | No            | 19.8        | 17.4        |             | 28.7        | 13.4        |             |             |              |
| Placed in belly or breast <sup>8</sup>                                                                                                                                                                                                          | Yes           | 49.6        | 66.3        | 16.7        | 41.6        | 57.4        | 15.7        | 1.0         | 0.888        |
|                                                                                                                                                                                                                                                 | No            | 50.4        | 33.7        |             | 58.4        | 42.6        |             |             |              |
| Applied nothing or only CHX on the cord <sup>8</sup>                                                                                                                                                                                            | Yes           | 71.2        | 87.5        | 16.3        | 65.9        | 72.9        | 7.1         | 9.2         | 0.277        |
|                                                                                                                                                                                                                                                 | No            | 28.8        | 12.5        |             | 34.1        | 27.1        |             |             |              |
| Initiated breastfeeding within one hour <sup>8</sup>                                                                                                                                                                                            | Yes           | 47.8        | 51.2        | 3.5         | 40.5        | 53.6        | 13.2        | -9.7        | 0.228        |
|                                                                                                                                                                                                                                                 | No            | 52.2        | 48.8        |             | 59.5        | 46.4        |             |             |              |
| <b>Immediate newborn care<sup>9</sup></b>                                                                                                                                                                                                       | <b>Better</b> | <b>74.4</b> | <b>85.9</b> | <b>11.5</b> | <b>64.3</b> | <b>79.9</b> | <b>15.7</b> | <b>-4.2</b> | <b>0.605</b> |
|                                                                                                                                                                                                                                                 | <b>Poorer</b> | <b>25.6</b> | <b>14.1</b> |             | <b>35.8</b> | <b>20.1</b> |             |             |              |
| <b>Postnatal care within 48 hours</b>                                                                                                                                                                                                           | <b>Yes</b>    | <b>33.7</b> | <b>44.6</b> | <b>10.9</b> | <b>26.8</b> | <b>17.4</b> | <b>-9.4</b> | <b>20.3</b> | <b>0.036</b> |
|                                                                                                                                                                                                                                                 | <b>No</b>     | <b>66.3</b> | <b>55.4</b> |             | <b>73.2</b> | <b>82.6</b> |             |             |              |

<sup>1</sup> At least one among: money, transport, blood donor, identified health worker, bought safe deliver kit

<sup>2</sup> Birth preparedness: is defined as "better practices" if at least any two preparations are arranged, and as "poorer practices" if less than two or no preparation among: money, transport, blood donor, identified health worker, bought safe deliver kit

<sup>3</sup> These information were asked only for the women who received antenatal care, thus it was assumed that those who didn't receive care didn't receive these services as well

<sup>4</sup> At lease one among blood pressure, urine sample, blood pressure, told about pregnancy complication and told about where to go in complication

<sup>5</sup> ANC care seeking is defined as "better practices" if all of the following were fulfilled and "poorer practices" if any of these were not fulfilled: ANC four or more visits, iron tablets (>90 tablets) taken, at least two doses of tetanus toxoid taken

<sup>6</sup> ANC quality is defined as "better practices" if at least four of following five items were fulfilled and "poorer practices" if less than four items were fulfilled: blood pressure, urine sample, blood sample, told about pregnancy complication and told about where to go in complication

<sup>7</sup> SBA (Skilled Birth Attendant): includes doctor, nurse and midwife

<sup>8</sup> These information was asked only for home births and it was assumed that these practices were followed in case of institutional deliveries.

<sup>9</sup> Immediate newborn care has been defined as "better" if at least three of the following were fulfilled and "poorer" if less than three were fulfilled among: delayed bathing, dried, wrapped, placed in belly or breast, applied nothing or only Chlorhexidine and initiated breastfeeding within one hour of birth

## Box 1 CBNCP programme components

- i. **Program planning and orientation:** This includes orientation of stakeholders on training overview, changes in roles and responsibilities of providers and supervisors, reporting and service delivery, required support from different stakeholders at local, district and national level. A detailed program implementation and monitoring plan per district prepared after the orientation
- ii. **Training/human resource:** Five different training packages were prepared: Master Training of Trainers and Training of Trainers (7+2 days), Service Providers from Health Facilities (5 days), Outreach Service Providers (7 days), Female Community Health Volunteers (5 days) and Program managers (2 days)

Training content and service provision requirement covered following components:

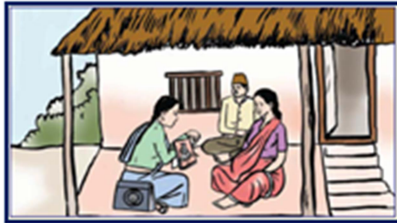

**behavior change communication** for birth preparedness and newborn care

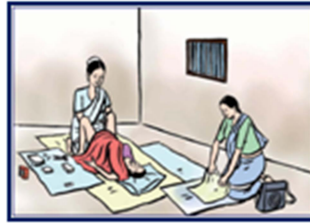

promotion of **institutional** or clean home delivery

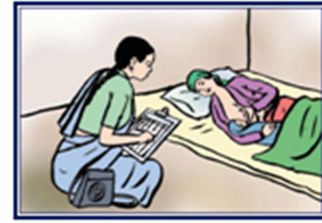

**postnatal care** to promote essential newborn care

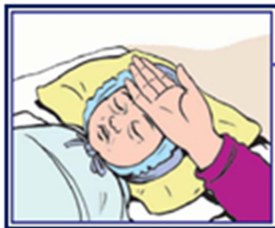

**community-based diagnosis and management** of possible **infection**

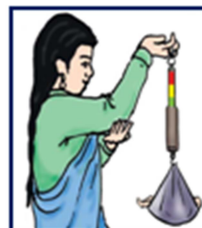

care of **low birth weight** newborns

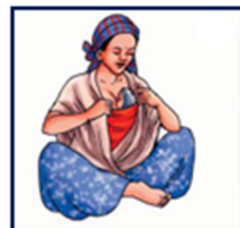

prevention and management of **hypothermia**

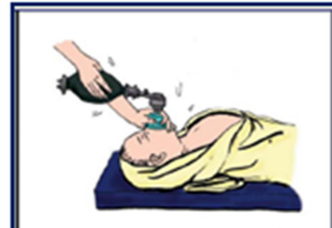

recognition, initial stimulation and resuscitation for **asphyxia**

- iii. **Supervision, monitoring and evaluation:** Utilizing existing and regular supervision and monitoring approach topped up with additional pilot phase intensive supervision from center, region, district and health facility level. Use of IMCI tools and additional CB NCP pilot tools (six forms CB NCP 1-6). Monthly review meeting with FCHVs at HF level, trimester review meeting at *llaka* level with HF providers, semi-annual review meeting at district level with all HFs. Additional regional and national review meetings.
- iv. **Logistics and supply chain management:** Ensuring regular availability of key drugs and commodities (e.g. gentamycin injection, insulin syringe, De Lee suction tube, clean delivery kit, bag-and-mask, acute respiratory infection (ARI) timer, cotrimoxazole pediatric tablets) at district, health facility and volunteer level
- v. **Communication:** Community and social mobilization, behavioral change communication, mass media, advocacy.
- vi. **Pay for performance:** Performance based (based on number of cases treated by a group of volunteers) incentives for volunteers to compensate for their effort during very specific and demanding period (primarily counselling on birth preparedness, being present on the day of delivery, follow up visits on day 3, 7 and 28 days)

Source and further details:

Pradhan YV, Upreti SR, KC NP, et al. Fitting Community Based Newborn Care Package into the health systems of Nepal. J Nepal Health Res Counc 2011;9(2):119-28.

| <b>Table S3</b>                                                                                                                                                                                                                                                                                |                                                         |           |           |                                                                   |           |           |                                  |           |           |                                                       |           |           |
|------------------------------------------------------------------------------------------------------------------------------------------------------------------------------------------------------------------------------------------------------------------------------------------------|---------------------------------------------------------|-----------|-----------|-------------------------------------------------------------------|-----------|-----------|----------------------------------|-----------|-----------|-------------------------------------------------------|-----------|-----------|
| <b>Health providers' knowledge and skills</b>                                                                                                                                                                                                                                                  |                                                         |           |           |                                                                   |           |           |                                  |           |           |                                                       |           |           |
| Percentage of health providers with correct knowledge of essential newborn care and dose of cotrimoxazole paediatric tablets to treat newborn babies with infections and ability to demonstrate hand washing and birth asphyxia steps as outlined in CBNCP training package based on NHIS data |                                                         |           |           |                                                                   |           |           |                                  |           |           |                                                       |           |           |
| District                                                                                                                                                                                                                                                                                       | Know all 5 essential newborn care messages <sup>1</sup> |           |           | Know correct dose of cotrimoxazole paediatric tablet <sup>2</sup> |           |           | Demonstrate correct hand washing |           |           | Demonstrate management of birth asphyxia (using doll) |           |           |
|                                                                                                                                                                                                                                                                                                | HW                                                      | CHW       | FCHV      | HWs                                                               | CHWs      | FCHVs     | HW                               | CHW       | FCHV      | HWs                                                   | CHWs      | FCHVs     |
| Bardiya                                                                                                                                                                                                                                                                                        | 76                                                      | 56        | 80        | 98                                                                | 95        | 97        | 81                               | 65        | 67        | 47                                                    | 43        | 39        |
| Chitwan                                                                                                                                                                                                                                                                                        | 43                                                      | 46        | 49        | 58                                                                | 78        | 69        | 71                               | 51        | 58        | 76                                                    | 61        | 39        |
| Dang                                                                                                                                                                                                                                                                                           | 95                                                      | 80        | 90        | 93                                                                | 90        | 97        | 86                               | 81        | 69        | 48                                                    | 30        | 52        |
| Dhankuta                                                                                                                                                                                                                                                                                       | 87                                                      | 57        | 37        | 89                                                                | 96        | 86        | 67                               | 42        | 58        | 61                                                    | 39        | 47        |
| Doti                                                                                                                                                                                                                                                                                           | na                                                      | na        | na        | 82                                                                | 95        | 84        | 76                               | 57        | 38        | 43                                                    | 24        | 9         |
| Kavre                                                                                                                                                                                                                                                                                          | 62                                                      | 56        | 18        | 91                                                                | 92        | 82        | 86                               | 66        | 52        | 48                                                    | 30        | 20        |
| Morang                                                                                                                                                                                                                                                                                         | 86                                                      | 82        | 84        | 91                                                                | 94        | 97        | 97                               | 85        | 63        | 88                                                    | 66        | --        |
| Palpa                                                                                                                                                                                                                                                                                          | 70                                                      | 59        | 61        | 90                                                                | 87        | 59        | 73                               | 70        | 55        | 42                                                    | 23        | 19        |
| Parsa                                                                                                                                                                                                                                                                                          | 51                                                      | 51        | 38        | 86                                                                | 88        | 53        | 90                               | 96        | 92        | 22                                                    | 17        | 1         |
| Sunsari                                                                                                                                                                                                                                                                                        | 59                                                      | 67        | 55        | 98                                                                | 95        | 97        | --                               | --        | 50        | --                                                    | --        | 18        |
| <b>Mean (unweighted)</b>                                                                                                                                                                                                                                                                       | <b>70</b>                                               | <b>62</b> | <b>57</b> | <b>88</b>                                                         | <b>91</b> | <b>82</b> | <b>81</b>                        | <b>68</b> | <b>60</b> | <b>53</b>                                             | <b>37</b> | <b>27</b> |

<sup>1</sup>Five ENC messages: immediate drying; maintain skin-to-skin contact; apply nothing on cord; immediate breastfeeding; delayed bathing

<sup>2</sup>Correct dose of cotrimoxazole paediatric tablet: half a tablet twice daily for five days for newborns aged 0-28 days  
CHW: community health worker; FCHV: female community health volunteer; HW: health worker.

Data source: Assessment of the community-based newborn care package (August 2012)
